# Supplementary material for: Morphological and Genetic Diversity within Salt Tolerance Detection in Eighteen Wheat Genotypes
Source: PubMed Central journal article supplement (PMC7154827; doi:10.3390/plants9030287), 2020-02-25
Supplement: plants-09-00287-s001.pdf [file plants-09-00287-s001.pdf]

Figure 1. Mean performance of chlorophyll content (ChL) and membrane stability index (MSI) for eighteen wheat genotypes grown under control and salinity conditions.

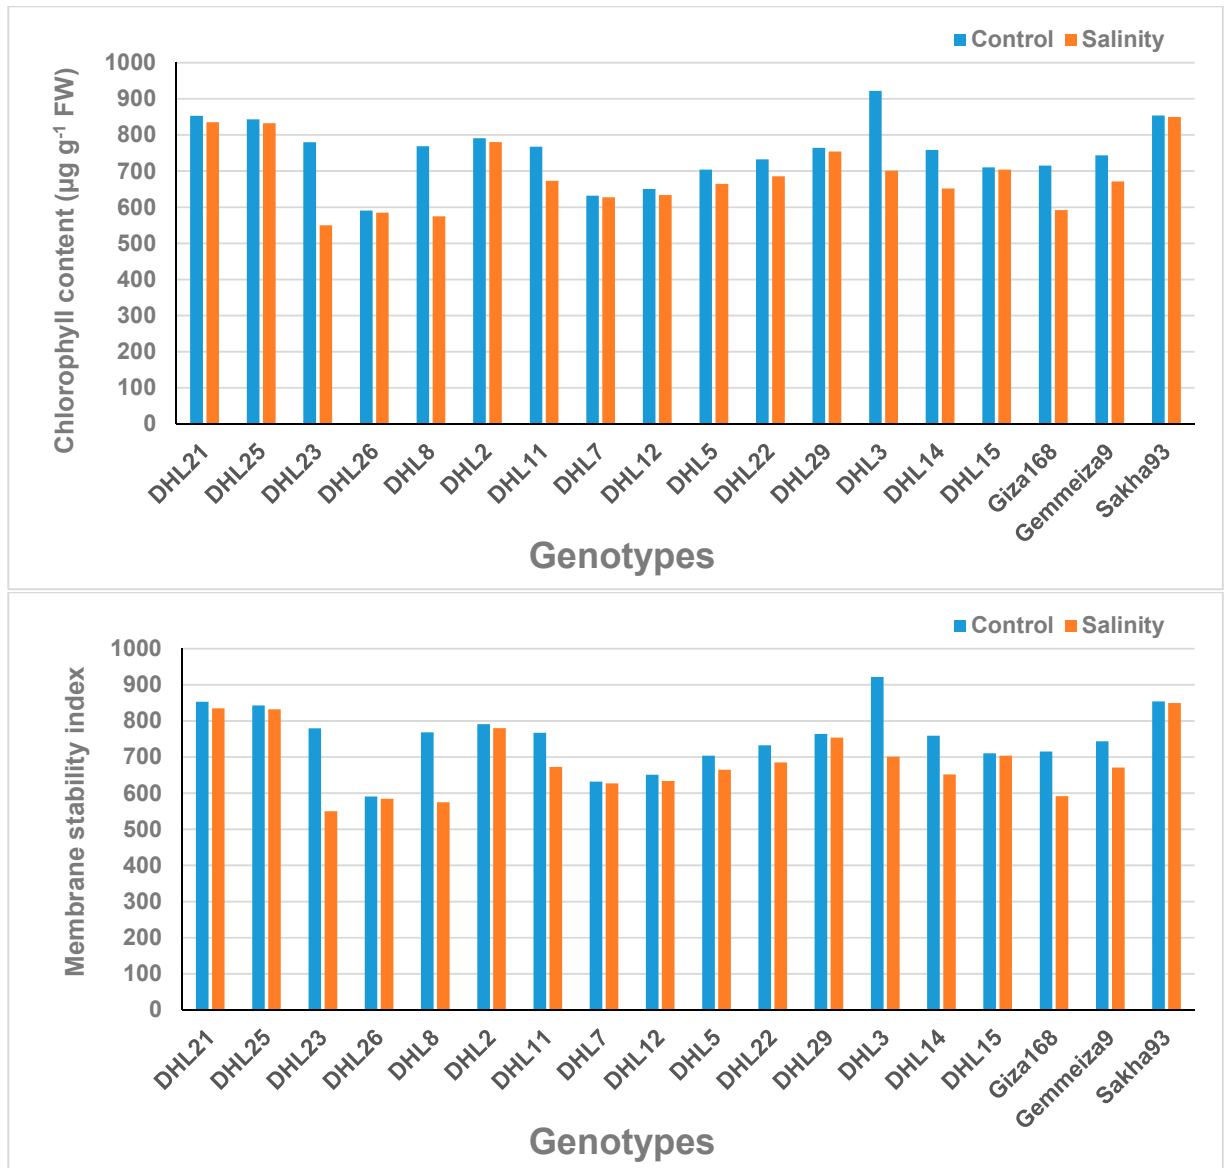

Table S1. The pedigree and salt tolerance of the three check bread wheat cultivars used in this study.

| Genotypes                   | Pedigree                                                                                                                                                                                                                                                                                                                                                                                         | Salt tolerance |
|-----------------------------|--------------------------------------------------------------------------------------------------------------------------------------------------------------------------------------------------------------------------------------------------------------------------------------------------------------------------------------------------------------------------------------------------|----------------|
| Check cultivars             |                                                                                                                                                                                                                                                                                                                                                                                                  |                |
| Sakha-93                    | Sakha 92/TR810328 S8871-IS-2S-IS-0S                                                                                                                                                                                                                                                                                                                                                              | Tolerant       |
| Giza-168                    | MRL/BUC//SERICM 93046-8 M-OY-OM-2Y-OB-OGZ.                                                                                                                                                                                                                                                                                                                                                       | Moderate       |
| Gemmeiza-9                  | Ald"s"/Huac//CMH74 .630/SxCGM 4583 -5GM- 1GM- OGM                                                                                                                                                                                                                                                                                                                                                | Sensitive      |
| Doubled haploid line (DHLs) |                                                                                                                                                                                                                                                                                                                                                                                                  |                |
| 15 DHLs                     | <p>The DHLs were obtained from the Agronomy Department, Faculty of Agriculture, Al-Azhar University, Nasr City, Cairo, Egypt, and published by El-Hennawy et al. (2011), and selected based on their good grain yield performance as follows:</p> <p>DHLs (21,22,23,25), derived from the cross (Line-115 × Gemmeiza-7)</p> <p>DHLs (5,7,8,11), derived from the cross (Line-115 × Giza-164)</p> |                |

Table S2. List of SSR markers used in the study across 18 wheat genotypes.

| Oligo Name | Chromosome | Sequence 5 to 3            |                             | Annealing temp. | Repeat        |
|------------|------------|----------------------------|-----------------------------|-----------------|---------------|
|            |            | F                          | R                           |                 |               |
| cslinkkna2 | 5A         | TCTCCATCATTCAACATCAATCG    | TGTAGCTCGTCGGGGTGTGTTGC     | 58              | -             |
| Xbarc182   | 7B         | CCATGGCCAACAGCTCAAGGTCTC   | CGCAAACCGCATCAGGGAAGCACCAAT | 58              | (CT)15        |
| Xcfd1      | 6B,6D,6A   | ACCAAAGAACTTGCCTGGTG       | AAGCCTGACCTAGCCCAAAT        | 60              | (GCC)6        |
| Xcfd13     | 6B,6D      | CCACTAACCAAGCTGCCATT       | TTTTTGGCATTGATCTGCTG        | 60              | (CT)20(TGTA)3 |
| Xcfd18     | 5D         | CATCCAACAGCACCAAGAGA       | GCTACTACTATTTTCATTGCGACCA   | 60              | (GA)25        |
| Xcfd183    | 5D         | ACTTGCACCTTGCTATACTTACGAA  | GTGTGTCCGGTGTGTGGAAAG       | 60              | (CA)22        |
| Xcfd19     | 1,5,6D     | TACGCAGGTTTGCTGCTTCT       | GGAGTTCACAAGCATGGGT         | 60              | (GA)18        |
| Xcfd46     | 7D         | TGGTGGTATAGTCGTTGGAGC      | CCACACACACACACCATCAA        | 60              | (GT)29        |
| Xcfd49     | 6D         | TGAGTTCTTCTGGTGAGGCA       | GAATCGGTTCAAGGGAAA          | 60              | (GA)33        |
| Xcfd60     | 6D,5B      | TGACCGGCATTCAGTATCAA       | TGGTCACTTTGATGAGCAGG        | 60              | (CA)25        |
| Xcfd66     | 7D         | AGGTCTTGGTGGTTTTGGTG       | TTTTCACATGCCACAGTTG         | 60              | (GC)9(AG)60   |
| Xcfd9      | 3D         | TTGCACGCACCTAAACTCTG       | CAAGTGTGAGCGTCGG            | 60              | (TC)29        |
| Xgwm133    | 3A,6,7B,6D | ATCTAAACAAGACGGCGGTG       | ATCTGTGACAACCGGTGAGA        | 60              | (CT)39imp     |
| Xgwm148    | 2B         | GTGAGGCAGCAAGAGAGAAA       | CAAAGCTTGACTCAGACCAAA       | 60              | (CA)22        |
| Xgwm174    | 5D         | GGGTTCTATCTGGTAAATCCC      | GACACACATGTTCTGCCAC         | 55              | (CT)22        |
| Xgwm181    | 3B         | TCA TTG GTA ATG AGG AGA GA | GAA CCA TTC ATG TGC ATG TC  | 51              | (GA)28        |
| Xgwm205    | 5D,5A      | CGACCCGGTTCACCTCAG         | AGTCGCCGTTGTATAGTGCC        | 60              | (CT)21        |
| Xgwm210    | 2A         | TGCATCAAGAATAGTGTGGAAG     | TGAGAGGAAGGCTCACACCT        | 55              | (GA)20        |
| Xgwm247    | 3A,3B      | GCAATCTTTTTTCTGACCACG      | ATG TGC ATG TCG GAC GC      | 55              | (GA)24        |
| Xgwm249    | 2D         | CAAATGGATCGAGAAAGGGA       | CTGCCATTTTTCTGGATCTACC      | 55              | (GA)11(GGA)8  |
| Xgwm296    | 2D,7D      | AATTCAACCTACCAATCTCTG      | GCCTAATAAACTGAAAACGAG       | 55              | (CT)28        |
| Xgwm299    | 3B,2B      | ACTACTTAGGCCTCCC GCC       | TGACCCACTTGCAATTCATC        | 55              | (GA)31(TAG)4  |
| Xgwm312    | 2A         | ATCGCATGATGCACGTAGAG       | ACATGCATGCCTACCTAATGG       | 60              | (GA)37        |
| Xgwm314    | 3D,4B      | AGGAGCTCCTCTGTGCCAC        | TTCGGGACTCTCTTCCCTG         | 55              | (CT)25imp     |
| Xgwm335    | 5B         | CGTACTCCACTCCACACGG        | CGGTCCAAGTGCTACCTTTC        | 55              | (GA)14(GCGT)3 |
| Xgwm340    | 3B         | GCAATCTTTTTTCTGACCACG      | ACGAGGCAAGAACACACATG        | 60              | (GA)26        |
| Xgwm350    | 7D         | ACCTCATCCACATGTTCTACG      | GCATGGATAGGACGCC            | 55              | (GT)14        |
| Xgwm413    | 1B,1A      | TGCTTGTCTAGATTGCTTGGG      | GATCGTCTCGTCCTTGGCA         | 60              | (GA)18        |
| Xgwm455    | 2D,6B      | ATTCGGTTCGCTAGCTACCA       | ACGGAGAGCAACCTGCC           | 55              | (GT)19imp     |

|         |          |                         |                          |    |                   |
|---------|----------|-------------------------|--------------------------|----|-------------------|
| Xgwm539 | 2D       | CTGCTCTAAGATTCATGCAACC  | GAGGCTTGTGCCCTCTGTAG     | 60 | (GA)27            |
| Xgwm614 | 2B,2A,2D | GATCACATGCATGCGTCATG    | TTTTACCGTTCCGGCCTT       | 60 | (GA)23imp         |
| Xgwm674 | 3A       | TCGAGCGATTTTCCTGC       | TGACCGAGTTGACCAAACA      | 60 | (CT)16CCC(GT)4    |
| Xwmc11  | 3A, 3D   | TTGTGATCCTGGTTGTGTTGTGA | CACCCAGCCGTTATATATGTTGA  | 61 | -                 |
| Xwmc169 | 3, 5A    | TACCCGAATCTGGAAAATCAAT  | TGGAAGCTTGCTAACTTTGGAG   | 61 | (CA)25 65 to 114  |
| Xwmc17  | 7A, 7B   | ACCTGCAAGAAATTAGGAACTC  | CTAGTGTTTCAAATATGTCGGA   | 51 | -                 |
| Xwmc170 | 2A,2D    | ACATCCACGTTTATGTTGTTGC  | TTGGTTGCTCAACGTTTACTTC   | 61 | (CA)19 378 to 415 |
| Xwmc18  | 2D       | CTGGGGCTTGGATCACGTCATT  | AGCCATGGACATGGTGTCTTC    | 61 | (CA)(CT) CM*      |
| Xwmc367 | 1B       | CTGACGTTGATGGGCCACTATT  | GTGGTGAAGAGGAAGGAGAGG    | 61 | (GCC)5 125 to 139 |
| Xwmc419 | 4B       | GTTTCGGATAAAACCGGAGTGC  | ACTACTTGTGGGTTATCACCAGCC | 61 | (GA)16 111 to 142 |
| Xwmc432 | 1D       | ATGACACCAGATCTAGCAC     | AATATTGGCATGATTACACA     | 51 | (GT)14 238 to 265 |
| Xwmc44  | 1B       | GGTCTTCTGGGCTTIGATCCTG  | TGTTGCTAGGGACCCGTAGTGG   | 61 | (GT)35 341 to 410 |
| Xwmc503 | 2D       | GCAATAGTTCCCGCAAGAAAAG  | ATCAACTACCTCCAGATCCCGT   | 61 | (GT)11 112 to 133 |
| Xwmc661 | 2B       | CCACCATGGTGCTAATAGTGTC  | AGCTCGTAACGTAATGCAACTG   | 61 | -                 |

\*Compound microsatellite

Table S3. Analysis of the differences between the groups of relative turgidity (RT) and shoot dry matter (SDM) traits.

| Groups                                                                  | RT       | SDM         |          |             |
|-------------------------------------------------------------------------|----------|-------------|----------|-------------|
| I                                                                       | 0.030 b  | 0.334 a     |          |             |
| S                                                                       | 0.057 b  | 0.142 b     |          |             |
| T                                                                       | 0.166 a  | 0.027 c     |          |             |
| Pr > F                                                                  | 0.000    | 0.000       |          |             |
| Significant                                                             | Yes      | Yes         |          |             |
| Summary (LS means) of all pairwise comparisons for groups (Fisher, LSD) |          |             |          |             |
| Contrast                                                                | RT       |             | SDM      |             |
|                                                                         | P value  | Significant | P value  | Significant |
| T vs I                                                                  | < 0.0001 | Yes         | < 0.0001 | Yes         |
| T vs S                                                                  | < 0.0001 | Yes         | < 0.0001 | Yes         |
| S vs I                                                                  | 0.0954   | No          | < 0.0001 | Yes         |

Tolerant (T), intermediate (I) and sensitive.

Table S4. Morphological distance estimation between 18 wheat genotypes using relative change of relative turgidity and shoot dry matter traits.

| Genotypes | DHL2  | DHL3  | DHL5  | DHL7  | DHL8  | DHL11 | DHL12 | DHL14 | DHL15 | DHL21 | DHL22 | DHL23 | DHL25 | DHL26 | DHL29 | Sakha93 | Giza168 |
|-----------|-------|-------|-------|-------|-------|-------|-------|-------|-------|-------|-------|-------|-------|-------|-------|---------|---------|
| DHL3      | 0.352 |       |       |       |       |       |       |       |       |       |       |       |       |       |       |         |         |
| DHL5      | 0.006 | 0.350 |       |       |       |       |       |       |       |       |       |       |       |       |       |         |         |
| DHL7      | 0.298 | 0.055 | 0.296 |       |       |       |       |       |       |       |       |       |       |       |       |         |         |
| DHL8      | 0.203 | 0.157 | 0.203 | 0.102 |       |       |       |       |       |       |       |       |       |       |       |         |         |
| DHL11     | 0.115 | 0.237 | 0.114 | 0.183 | 0.089 |       |       |       |       |       |       |       |       |       |       |         |         |
| DHL12     | 0.131 | 0.227 | 0.131 | 0.172 | 0.073 | 0.024 |       |       |       |       |       |       |       |       |       |         |         |
| DHL14     | 0.353 | 0.023 | 0.352 | 0.056 | 0.153 | 0.238 | 0.225 |       |       |       |       |       |       |       |       |         |         |
| DHL15     | 0.332 | 0.025 | 0.331 | 0.034 | 0.134 | 0.217 | 0.205 | 0.022 |       |       |       |       |       |       |       |         |         |
| DHL21     | 0.072 | 0.383 | 0.067 | 0.332 | 0.248 | 0.160 | 0.182 | 0.388 | 0.366 |       |       |       |       |       |       |         |         |
| DHL22     | 0.311 | 0.043 | 0.310 | 0.014 | 0.114 | 0.196 | 0.185 | 0.042 | 0.021 | 0.345 |       |       |       |       |       |         |         |
| DHL23     | 0.190 | 0.205 | 0.192 | 0.153 | 0.061 | 0.095 | 0.071 | 0.196 | 0.181 | 0.249 | 0.163 |       |       |       |       |         |         |
| DHL25     | 0.043 | 0.325 | 0.037 | 0.272 | 0.185 | 0.097 | 0.118 | 0.328 | 0.307 | 0.064 | 0.286 | 0.185 |       |       |       |         |         |
| DHL26     | 0.072 | 0.282 | 0.073 | 0.228 | 0.131 | 0.045 | 0.059 | 0.282 | 0.262 | 0.128 | 0.241 | 0.121 | 0.066 |       |       |         |         |
| DHL29     | 0.315 | 0.043 | 0.314 | 0.020 | 0.116 | 0.200 | 0.188 | 0.037 | 0.018 | 0.351 | 0.008 | 0.163 | 0.291 | 0.245 |       |         |         |
| Sakha93   | 0.042 | 0.378 | 0.039 | 0.325 | 0.236 | 0.147 | 0.166 | 0.381 | 0.360 | 0.033 | 0.339 | 0.229 | 0.053 | 0.109 | 0.344 |         |         |
| Giza168   | 0.161 | 0.216 | 0.162 | 0.161 | 0.060 | 0.064 | 0.040 | 0.210 | 0.192 | 0.218 | 0.173 | 0.032 | 0.154 | 0.090 | 0.174 | 0.199   |         |
| Gemmeiza9 | 0.342 | 0.012 | 0.341 | 0.045 | 0.146 | 0.228 | 0.217 | 0.019 | 0.013 | 0.375 | 0.032 | 0.194 | 0.316 | 0.273 | 0.031 | 0.369   | 0.205   |

Doubled haploid line (DHL)

Table S5. Genetic distance estimation between 18 wheat genotypes using SSR molecular markers.

| Genotypes | DHL2  | DHL3  | DHL5  | DHL7  | DHL8  | DHL11 | DHL12 | DHL14 | DHL15 | DHL21 | DHL22 | DHL23 | DHL25 | DHL26 | DHL29 | Sakha93 | Giza168 |
|-----------|-------|-------|-------|-------|-------|-------|-------|-------|-------|-------|-------|-------|-------|-------|-------|---------|---------|
| DHL3      | 0.731 |       |       |       |       |       |       |       |       |       |       |       |       |       |       |         |         |
| DHL5      | 0.423 | 0.667 |       |       |       |       |       |       |       |       |       |       |       |       |       |         |         |
| DHL7      | 0.846 | 0.611 | 0.821 |       |       |       |       |       |       |       |       |       |       |       |       |         |         |
| DHL8      | 0.781 | 0.741 | 0.645 | 0.708 |       |       |       |       |       |       |       |       |       |       |       |         |         |
| DHL11     | 0.774 | 0.731 | 0.633 | 0.846 | 0.607 |       |       |       |       |       |       |       |       |       |       |         |         |
| DHL12     | 0.773 | 0.625 | 0.696 | 1.000 | 0.833 | 0.826 |       |       |       |       |       |       |       |       |       |         |         |
| DHL14     | 0.654 | 0.125 | 0.593 | 0.650 | 0.714 | 0.750 | 0.500 |       |       |       |       |       |       |       |       |         |         |
| DHL15     | 0.958 | 0.667 | 0.833 | 0.867 | 0.870 | 0.913 | 0.727 | 0.706 |       |       |       |       |       |       |       |         |         |
| DHL21     | 0.700 | 0.867 | 0.645 | 0.852 | 0.750 | 0.655 | 0.783 | 0.800 | 0.960 |       |       |       |       |       |       |         |         |
| DHL22     | 0.920 | 0.625 | 0.846 | 0.417 | 0.783 | 0.826 | 0.933 | 0.667 | 0.727 | 0.880 |       |       |       |       |       |         |         |
| DHL23     | 0.767 | 0.815 | 0.667 | 0.840 | 0.417 | 0.630 | 0.870 | 0.786 | 0.909 | 0.774 | 0.818 |       |       |       |       |         |         |
| DHL25     | 0.813 | 0.731 | 0.677 | 0.800 | 0.742 | 0.480 | 0.875 | 0.750 | 0.958 | 0.500 | 0.773 | 0.630 |       |       |       |         |         |
| DHL26     | 0.654 | 0.750 | 0.593 | 0.826 | 0.714 | 0.409 | 0.857 | 0.769 | 0.900 | 0.667 | 0.909 | 0.786 | 0.704 |       |       |         |         |
| DHL29     | 0.714 | 0.591 | 0.655 | 0.727 | 0.577 | 0.714 | 0.750 | 0.500 | 0.789 | 0.724 | 0.684 | 0.704 | 0.714 | 0.821 |       |         |         |
| Sakha93   | 0.647 | 0.829 | 0.639 | 0.882 | 0.730 | 0.563 | 0.793 | 0.806 | 0.900 | 0.484 | 0.939 | 0.750 | 0.563 | 0.613 | 0.743 |         |         |
| Giza168   | 0.692 | 0.682 | 0.679 | 0.870 | 0.793 | 0.786 | 0.647 | 0.591 | 0.765 | 0.750 | 0.789 | 0.821 | 0.867 | 0.760 | 0.667 | 0.688   |         |
| Gemmeiza9 | 0.846 | 0.438 | 0.821 | 0.533 | 0.708 | 0.800 | 0.813 | 0.500 | 0.583 | 0.893 | 0.273 | 0.739 | 0.800 | 0.875 | 0.667 | 0.882   | 0.700   |

Doubled haploid line (DHL)
